# Supplementary material for: Optic Nerve Sheath Diameter for Predicting Outcomes in Post-Cardiac Arrest Syndrome: An Updated Systematic Review and Meta-Analysis
Source: MDPI journal article supplement (doi:10.3390/jpm12030500), 2022-03-20
Supplement: s1 [file s1]

## Supplementary Material

**Table S1.** Comprehensive list presenting the search strategy.

### Embase.

| No. | Searches                                                                                                                                                                                                                                                                                                                                                                                                                                                                  | Results |
|-----|---------------------------------------------------------------------------------------------------------------------------------------------------------------------------------------------------------------------------------------------------------------------------------------------------------------------------------------------------------------------------------------------------------------------------------------------------------------------------|---------|
| 1   | (return of spontaneous circulation or ROSC).ti,ab. or exp heart arrest/ or cardiac arrest*.ti,ab. or cardiovascular arrest*.ti,ab. or heart arrest*.ti,ab. or cardiopulmonary arrest*.ti,ab. or asystol*.ti,ab. or pulseless electrical activity.ti,ab. or exp ventricular fibrillation/ or exp advanced cardiac life support/ or (advanced cardiac life support or ACLS).ti,ab. or exp cardiopulmonary resuscitation/ or CPR.mp. or cardiopulmonary resuscitation.ti,ab. | 224,915 |
| 2   | optic nerve sheath diameter.mp. or exp optic nerve/ or exp optic nerve sheath diameter/ or nerve sheath/                                                                                                                                                                                                                                                                                                                                                                  | 27,533  |
| 3   | ONSD.ti,ab.                                                                                                                                                                                                                                                                                                                                                                                                                                                               | 37      |
| 4   | 2 or 3                                                                                                                                                                                                                                                                                                                                                                                                                                                                    | 27,533  |
| 5   | 1 and 4                                                                                                                                                                                                                                                                                                                                                                                                                                                                   | 87      |

### Medline.

| No. | Searches                                                                                                                                                                                                                                                                                                                                                                                                                                                                  | Results |
|-----|---------------------------------------------------------------------------------------------------------------------------------------------------------------------------------------------------------------------------------------------------------------------------------------------------------------------------------------------------------------------------------------------------------------------------------------------------------------------------|---------|
| 1   | (return of spontaneous circulation or ROSC).ti,ab. or exp heart arrest/ or cardiac arrest*.ti,ab. or cardiovascular arrest*.ti,ab. or heart arrest*.ti,ab. or cardiopulmonary arrest*.ti,ab. or asystol*.ti,ab. or pulseless electrical activity.ti,ab. or exp ventricular fibrillation/ or exp advanced cardiac life support/ or (advanced cardiac life support or ACLS).ti,ab. or exp cardiopulmonary resuscitation/ or CPR.mp. or cardiopulmonary resuscitation.ti,ab. | 98,122  |
| 2   | exp Optic Nerve/ or optic nerve sheath diameter.mp.                                                                                                                                                                                                                                                                                                                                                                                                                       | 31,556  |
| 3   | ONSD.ti,ab.                                                                                                                                                                                                                                                                                                                                                                                                                                                               | 11      |
| 4   | 2 or 3                                                                                                                                                                                                                                                                                                                                                                                                                                                                    | 31,556  |
| 5   | 1 and 4                                                                                                                                                                                                                                                                                                                                                                                                                                                                   | 41      |

### Cochrane library.

| No. | Searches                                                               | Results |
|-----|------------------------------------------------------------------------|---------|
| 1   | MeSH descriptor: (Return of Spontaneous Circulation) explode all trees | 1       |
| 2   | MeSH descriptor: (Heart Arrest) explode all trees                      | 1998    |
| 3   | MeSH descriptor: (Resuscitation) explode all trees                     | 5177    |
| 4   | MeSH descriptor: (Advanced Cardiac Life Support) explode all trees     | 60      |
| 5   | 1 or 2 or 3 or 4                                                       | 6463    |
| 6   | MeSH descriptor: (Optic Nerve) explode all trees                       | 332     |
| 7   | (ONSD):ti,ab,kw (Word variations have been searched)                   | 83      |
| 8   | 6 or 7                                                                 | 399     |
| 9   | 5 and 8                                                                | 0       |

**Table S2.** Patients' characteristics.

| CPR         |          |     |                  |         |                   |            |                  |              |                   |                    |                |                             |       | After ROSC |  |
|-------------|----------|-----|------------------|---------|-------------------|------------|------------------|--------------|-------------------|--------------------|----------------|-----------------------------|-------|------------|--|
|             | Outcome  | N   | Age              | Male, % | Cardiac origin, % | Witness, % | Bystander CPR, % | Shockable, % | No flow time, min | Low flow time, min | ROSC, min      | Time of image modality, min | TTM % |            |  |
| Chae 2016   | GNO      | 45  | 48.8 (16.3)      | 71.1    | 88.9              | -          | 53.3             | 55.6         | 4 (5.8)           | 20.6 (17.9)        | 24.6 (18.6)    | 55.5 (35.5–121.5)           | 100   |            |  |
|             | PNO      | 74  | 56.4 (17.4)      | 55.4    | 36.5              | -          | 35.1             | 20.3         | 12.7 (13.2)       | 26.4 (15.0)        | 39.0 (20.7)    | 63 (39–125)                 | 100   |            |  |
|             | Total    | 119 | 53.53 (17.32)    | 61.3    | -                 | -          | -                | 33.6         | -                 | -                  | -              | -                           | 100   |            |  |
| Chelly 2016 | Survival | 19  | 53 (40–65)       | 68      | 53                | 90         | 79               | 63           | 1 (1–2)           | 10 (3-16)          | -              | -                           | -     |            |  |
|             | Death    | 17  | 58 (55–73)       | 71      | 18                | 65         | 41               | 18           | 9 (2–10)          | 20 (10-32)         | -              | -                           | -     |            |  |
|             | Total    | 36  | 58 (45–69)       | 69      | 36                | 78         | 64               | 42           | 2 (1–9)           | 15 (7-30)          | -              | -                           | -     |            |  |
| Ertl 2018   | Survival | 23  | 59 (20–90)       | 74      | -                 | -          | -                | 74           | -                 | -                  | -              | -                           | 77    |            |  |
|             | Death    | 26  | 69 (35–96)       | 69      | -                 | -          | -                | 46           | -                 | -                  | -              | -                           | 46    |            |  |
|             | Total    | 49  | 65 (20–96)       | 71      | -                 | -          | -                | 59           | -                 | -                  | -              | -                           | 60    |            |  |
| Kim 2014    | GNO      | 23  | 50 (44–59)       | 74      | 61                | 91         | 61               | 52           | -                 | -                  | 11 (5–25)      | 60 (21–149)                 | 56    |            |  |
|             | PNO      | 68  | 61 (48–71)       | 59      | 31                | 34         | 29               | 15           | -                 | -                  | 31.5 (20.5–48) | 55 (30–120)                 | 40    |            |  |
|             | Total    | 91  | 57.73 (16.60)    | 62.6    | -                 | -          | -                | 24.2         | -                 | -                  | -              | -                           | -     |            |  |
| Lee 2018    | GNO      | 99  | 52.03 (14.41)    | 71.72   | 84.85             | 79.80      | 72.73            | 60.61        | 2.42 (4.35)       | 21.28 (13.68)      | -              | -                           | 100   |            |  |
|             | PNO      | 230 | 61.47 (15.92)    | 69.13   | 51.74             | 62.61      | 59.13            | 14.35        | 4.58 (7.56)       | 29.07 (14.93)      | -              | -                           | 100   |            |  |
|             | Survival | 162 | 54.61 (15.69)    | 65.42   | 71.60             | 73.46      | 66.67            | 43.83        | 2.79 (4.43)       | 22.14 (13.07)      | -              | -                           | 100   |            |  |
|             | Death    | 167 | 62.64 (15.44)    | 71.86   | 52.10             | 62.28      | 59.88            | 13.17        | 5.04 (8.39)       | 31.19 (15.40)      | -              | -                           | 100   |            |  |
|             | Total    | 329 | 58.63 (16.06)    | 69.9    | -                 | -          | -                | 28.3         | -                 | -                  | -              | -                           | 100   |            |  |
| Park 2019   | GNO      | 18  | 50.67 (15.49)    | 83.33   | 50.00             | 72.22      | 88.89            | 61.11        | 0.5 (0–5.0)       | 12.67 (9.05)       | -              | -                           | 100   |            |  |
|             | PNO      | 18  | 53.00 (15.93)    | 61.11   | 11.12             | 50.00      | 61.11            | 11.12        | 3.5 (0.75–16.25)  | 27.50 (13.68)      | -              | -                           | 100   |            |  |
|             | Total    | 36  | 51.83 (15.53)    | 72.22   | 30.56             | 61.11      | 75.00            | 14.11        | 2.0 (0-12.75)     | 20.08 (13.68)      | -              | -                           | 100   |            |  |
| Rush 2017   | GNO      | 18  | 57.7 (15.3)      | 83.3    | -                 | 94.4       | 88.9             | 38.9         | -                 | -                  | 9.3 (7.8)      | 9.3 (10.0)                  | -     |            |  |
|             | PNO      | 54  | 64.1 (15.1)      | 83.3    | -                 | 76.0       | 79.6             | 27.8         | -                 | -                  | 27.7 915.0)    | 10.2 (11.2)                 | -     |            |  |
|             | Total    | 72  | 62.5 (15.3)      | 83.3    | -                 | -          | -                | 30.6         | -                 | -                  | -              | -                           | -     |            |  |
| Ryu 2017    | GNO      | 19  | 41.0 (32.0–70.5) | 73.7    | -                 | 100        | 100              | 42.1         | -                 | -                  | -              | -                           | 36.8  |            |  |
|             | PNO      | 23  | 52.0 (43.0–60.5) | 65.2    | -                 | 100        | 100              | 39.1         | -                 | -                  | -              | -                           | 39.1  |            |  |
|             | Total    | 42  | 51.0 (34.0–65.0) | 69.0    | -                 | 100        | 100              | 40.5         | -                 | -                  | -              | -                           | 38.1  |            |  |
| Ueda 2015   | Total    | 17  | 74.8 (55–92)     | 53      | -                 | -          | 71               | 29           | -                 | -                  | -              | -                           | 24    |            |  |

Data are presented as mean (SD) or median (interquartile range).

**Table S3.** Detailed analysis of prognostic accuracy of the optic nerve sheath diameter for poor neurologic outcomes in each study.

| Study | ONSD cut-off point (mm) | N   | TP (n) | FP (n) | FN (n) | TN (n) | Sensitivity (%) | Specificity (%) | PPV (%) | NPV (%) |
|-------|-------------------------|-----|--------|--------|--------|--------|-----------------|-----------------|---------|---------|
| Chae  | 7.0                     | 119 | 4      | 0      | 70     | 45     | 5.5             | 100             | 100     | 38.4    |
| Kim   | 6.21                    | 91  | 38     | 0      | 30     | 23     | 55.9            | 100             | 100     | 43.4    |
| Park  | 4.9                     | 36  | 15     | 1      | 3      | 17     | 83.3            | 94.4            | 93.8    | 85.0    |
| Ryu   | 6.69                    | 42  | 5      | 0      | 18     | 19     | 21.7            | 100             | 100     | 51.4    |
| Ueda  | 5.4                     | 17  | 8      | 1      | 3      | 5      | 72.7            | 83.3            | 88.9    | 62.5    |

ONSD = optic nerve sheath diameter; TP = true positive; FP = false positive; FN = false negative; TN = true negative; PPV = positive predictive value; NPV = negative predictive value.

**Supplementary Table S4.** Subgroup analysis of included studies to identify the association of optic nerve sheath diameter with poor neurologic outcome.

| <b>Covariate</b> | <b>N</b> | <b>ONSD, SMD (95% CI)</b> | <b>p-value</b> | <b>I<sup>2</sup>, %</b> | <b>p-value for heterogeneity</b> |
|------------------|----------|---------------------------|----------------|-------------------------|----------------------------------|
| All              | 7        | 0.74 (0.22, 1.27)         | 0.006          | 87                      | <0.001                           |
| Country          |          |                           |                |                         |                                  |
| South Korea      | 5        | 0.93 (0.27, 1.60)         | 0.006          | 91                      | <0.001                           |
| Other countries  | 2        | 0.15 (−0.5, 0.80)         | 0.65           | 33                      | 0.22                             |
| PNO, %           |          |                           |                |                         |                                  |
| > 65             | 3        | 0.56 (−0.4, 1.51)         | 0.25           | 93                      | <0.001                           |
| < 65             | 4        | 0.91 (0.21, 1.62)         | 0.01           | 78                      | 0.004                            |
| Modality         |          |                           |                |                         |                                  |
| CT               | 5        | 0.55 (0.01, 1.09)         | 0.05           | 88                      | <0.001                           |
| US               | 2        | 1.37 (0.03, 2.71)         | 0.04           | 76                      | 0.04                             |
| TTM              |          |                           |                |                         |                                  |
| 100%             | 3        | 0.7 (−0.04, 1.44)         | 0.06           | 90                      | <0.001                           |
| <100%            | 3        | 1.11 (0.43, 1.79)         | 0.001          | 65                      | 0.06                             |

N = the number of studies; ONSD = optic nerve sheath diameter; SMD = standardized mean differences; CI = confidence interval; PNO = poor neurologic outcome; CT = computed tomography; MRI = magnetic resonance imaging; US = ultrasound; TTM = targeted temperature management.

**Table S5.** Sensitivity analysis of included studies to identify the association of optic nerve sheath diameter with neurologic outcome.

| <b>Study</b>       | <b>ONSD, SMD (95% CI)</b> | <b>p-value</b> | <b>I<sup>2</sup>, %</b> | <b>p-value for heterogeneity</b> |
|--------------------|---------------------------|----------------|-------------------------|----------------------------------|
| All                | 0.74 (0.22, 1.27)         | 0.006          | 87                      | < 0.001                          |
| Omitting Chae 2016 | 0.83 (0.15, 1.51)         | 0.02           | 89                      | <0.001                           |
| Omitting Kim 2014  | 0.55 (0.09, 1.00)         | 0.02           | 79                      | 0.0002                           |
| Omitting Lee 2018  | 0.88 (0.24, 1.52)         | 0.007          | 85                      | < 0.001                          |
| Omitting Park 2019 | 0.56 (0.07, 1.05)         | 0.03           | 85                      | < 0.001                          |
| Omitting Rush 2017 | 0.89 (0.29, 1.49)         | 0.004          | 89                      | < 0.001                          |
| Omitting Ryu 2017  | 0.74 (0.14, 1.34)         | 0.02           | 89                      | < 0.001                          |
| Omitting Ueda 2015 | 0.76 (0.18, 1.33)         | 0.01           | 89                      | < 0.001                          |

ONSD = optic nerve sheath diameter; SMD = standardized mean differences; CI = confidence interval.

**Table S6.** Meta-regression analyses for potential causes of heterogeneity.

| Covariates                         | N | p-value | Regression coefficient (B) |
|------------------------------------|---|---------|----------------------------|
| Sample size                        | 7 | 0.2510  | -0.0031                    |
| Time from ROSC to ONSD measurement | 7 | 0.9824  | 0.0003                     |
| Age                                | 7 | 0.4006  | -0.0336                    |
| Male, %                            | 7 | 0.5100  | -0.0212                    |
| Shockable rhythm, %                | 7 | 0.0805  | -0.0624                    |

N = the number of studies; ROSC = return of spontaneous circulation; ONSD = optic nerve sheath diameter.

**Table S7.** Analysis of prognostic accuracy for poor neurologic outcome of this updated meta-analysis comparing with previous meta-analyses.

| This updated meta-analysis (total N) |                          |                    |                          |                    |                          |                    | Previous meta-analyses (total N) |                    |                                 |                    |
|--------------------------------------|--------------------------|--------------------|--------------------------|--------------------|--------------------------|--------------------|----------------------------------|--------------------|---------------------------------|--------------------|
|                                      | 3 CT + 2 US (5)          | I <sup>2</sup> (%) | 3 CT (4)                 | I <sup>2</sup> (%) | 2 US (2)                 | I <sup>2</sup> (%) | 5 CT + 3 US (8)<br>(Lee 2019)    | I <sup>2</sup> (%) | 3 CT + 5 US (8)<br>(Zhang 2020) | I <sup>2</sup> (%) |
| <b>Pooled SEN</b>                    | 0.361 (0.293–0.433)      | 94.7               | 0.285 (0.217–0.360)      | 95.9               | 0.793 (0.603–0.920)      | 0                  | 0.41 (0.20–0.67)                 | 95.7               | 0.60 (0.45–0.73)                | -                  |
| <b>Pooled SPE</b>                    | 0.982 (0.936–0.998)      | 42.0               | 1.000 (0.958–1.000)      | 0                  | 0.917 (0.730–0.990)      | 0                  | 0.99 (0.82–1.0)                  | 94.6               | 0.94 (0.83–0.98)                | -                  |
| <b>Pooled PLR</b>                    | 9.097 (3.258–25.402)     | 0                  | 11.382<br>(2.227–58.175) | 0                  | 7.852 (2.094–29.442)     | 0                  | 49.0 (2.4–958.9)                 | -                  | -                               | -                  |
| <b>Pooled NLR</b>                    | 0.504 (0.254–1.002)      | 96.9               | 0.703 (0.397–1.245)      | 96.5               | 0.241 (0.116–0.501)      | 0                  | 0.59 (0.39–0.90)                 | -                  | -                               | -                  |
| <b>DOR</b>                           | 23.971<br>(7.182–80.008) | 0                  | 16.408<br>(3.048–88.322) | 0                  | 35.527<br>(5.799–217.64) | 9.2                | 83<br>(4–1525)                   | -                  | 15.62<br>(5.50–44.34)           | -                  |
| <b>SROC (AUC)</b>                    | 0.8668                   | -                  | 0.7395                   | -                  | 0.5000                   | -                  | 0.86 (0.83–0.89)*                | -                  | 0.87 (0.84–0.90)                | -                  |
| <b>SE (AUC)</b>                      | 0.0776                   | -                  | 0.0882                   | -                  | 0                        | -                  | -                                | -                  | -                               | -                  |
| <b>Q</b>                             | 0.7973                   | -                  | 0.6848                   | -                  | 0.5                      | -                  | -                                | -                  | -                               | -                  |
| <b>SE (Q)</b>                        | 0.0760                   | -                  | 0.0723                   | -                  | 0                        | -                  | -                                | -                  | -                               | -                  |

N = the number of studies; ROSC = return of spontaneous circulation; ONSD = optic nerve sheath diameter; CT = computed tomography; US = ultrasonography; SEN = sensitivity; SPE = specificity; PLR = positive likelihood ratio; NLR = negative likelihood ratio; DOR = diagnostic odds ratio; SROC = summary receiver operating characteristic; SE = standard error; AUC = area under the curve; CI = confidence interval; ONSD = optic nerve sheath diameter; LR = likelihood. \* hierarchical summary receiver operating characteristic (HSROC).

**Table S8.** GRADE profile for assessing quality of evidence for the included studies for outcomes

**Author(s):**  
**Question:** Optic nerve sheath diameter for predicting outcomes in post-cardiac arrest syndrome  
**Setting:**  
**Bibliography:**

ibliography:

| Certainty assessment                            |                       |                      |                      |                      |                      |                      | N <sub>2</sub> of patients |                         | Effect            |                                                        | Certainty        | Importance |
|-------------------------------------------------|-----------------------|----------------------|----------------------|----------------------|----------------------|----------------------|----------------------------|-------------------------|-------------------|--------------------------------------------------------|------------------|------------|
| N <sub>2</sub> of studies                       | Study design          | Risk of bias         | Inconsistency        | Indirectness         | Imprecision          | Other considerations | ONSD of PNO or death       | ONSD of GNO or survival | Relative (95% CI) | Absolute (95% CI)                                      |                  |            |
| Poor neurological outcome at hospital discharge |                       |                      |                      |                      |                      |                      |                            |                         |                   |                                                        |                  |            |
| 3                                               | observational studies | not serious          | serious <sup>a</sup> | not serious          | serious <sup>b</sup> | none                 | 145                        | 60                      | -                 | SMD <b>0.8 SD higher</b> (0.25 lower to 1.85 higher)   | ⊕⊕○○<br>Low      | CRITICAL   |
| Poor neurological outcome at 1 month            |                       |                      |                      |                      |                      |                      |                            |                         |                   |                                                        |                  |            |
| 2                                               | observational studies | not serious          | serious <sup>c</sup> | not serious          | serious <sup>b</sup> | none                 | 85                         | 51                      | -                 | SMD <b>0.39 SD higher</b> (0.04 higher to 0.74 higher) | ⊕⊕○○<br>Low      | CRITICAL   |
| Poor neurological outcome at 3 months           |                       |                      |                      |                      |                      |                      |                            |                         |                   |                                                        |                  |            |
| 1                                               | observational studies | serious <sup>d</sup> | serious              | not serious          | serious <sup>b</sup> | none                 | 18                         | 18                      | -                 | SMD <b>2.02 SD higher</b> (1.2 higher to 2.84 higher)  | ⊕○○○<br>Very low | CRITICAL   |
| Poor neurological outcome at 6 months           |                       |                      |                      |                      |                      |                      |                            |                         |                   |                                                        |                  |            |
| 1                                               | observational studies | serious <sup>e</sup> | not serious          | not serious          | serious <sup>f</sup> | none                 | 230                        | 99                      | -                 | SMD <b>0.11 SD higher</b> (0.13 lower to 0.34 higher)  | ⊕⊕○○<br>Low      | CRITICAL   |
| Death at hospital discharge                     |                       |                      |                      |                      |                      |                      |                            |                         |                   |                                                        |                  |            |
| 2                                               | observational studies | serious <sup>e</sup> | not serious          | serious <sup>g</sup> | serious <sup>b</sup> | none                 | 42                         | 43                      | -                 | SMD <b>1.28 SD higher</b> (0.81 higher to 1.75 higher) | ⊕○○○<br>Very low | CRITICAL   |
| Death at 6 months                               |                       |                      |                      |                      |                      |                      |                            |                         |                   |                                                        |                  |            |
| 1                                               | observational studies | not serious          | not serious          | not serious          | serious <sup>f</sup> | none                 | 167                        | 162                     | -                 | SMD <b>0.12 SD higher</b> (0.09 lower to 0.34 higher)  | ⊕○○○<br>Very low | CRITICAL   |

**CI:** confidence interval; **SMD:** standardised mean difference

#### Explanations

- a. Neither the same direction nor similar magnitude of the effect
- b. Total sample size limited
- c. The studies had a wide confidence interval spanning.
- d. High flow and timing
- e. High index test
- f. The total included studies are too small
- g. the only short-term outcome was measured.

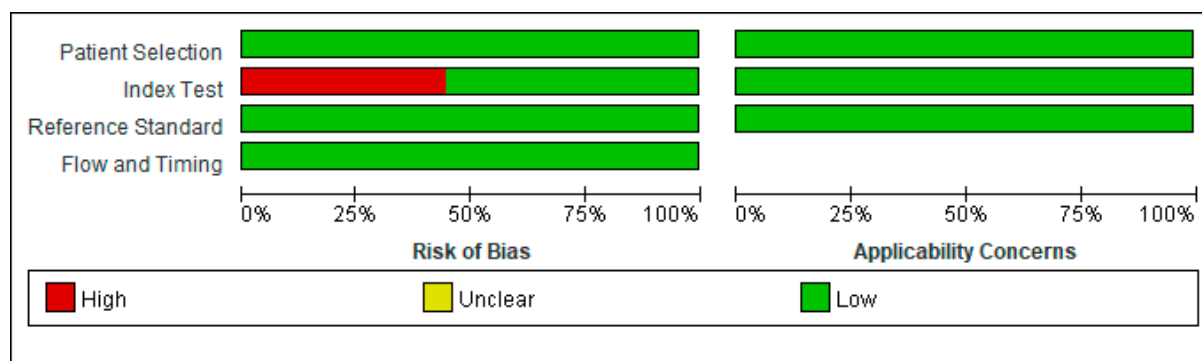

(a)

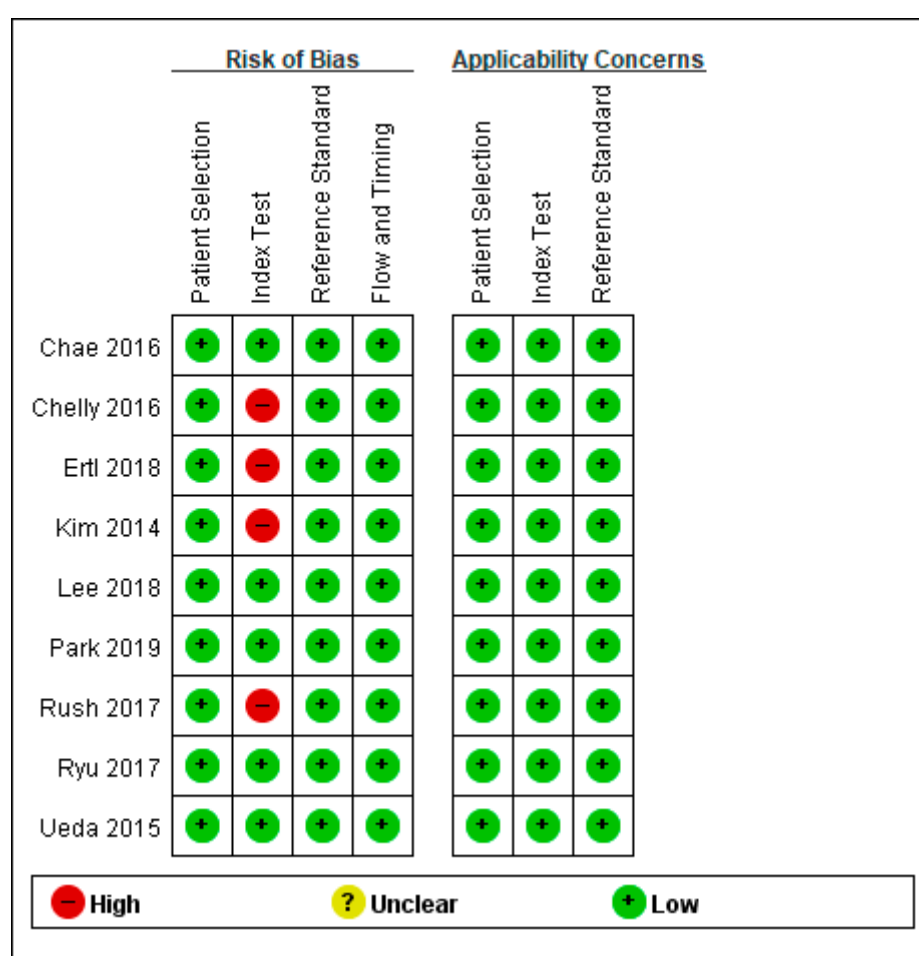

(b)

Figure S1. Assessment of study quality.

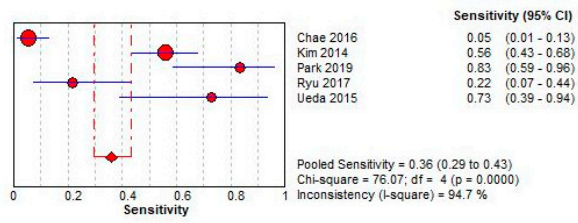

A

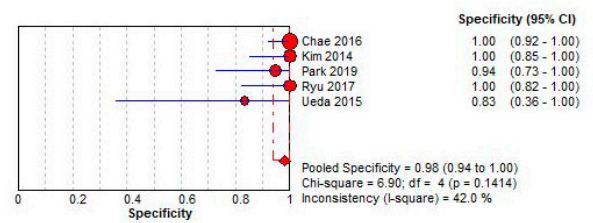

B

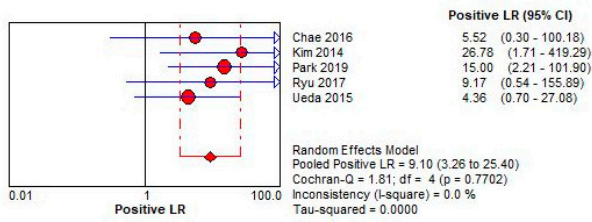

C

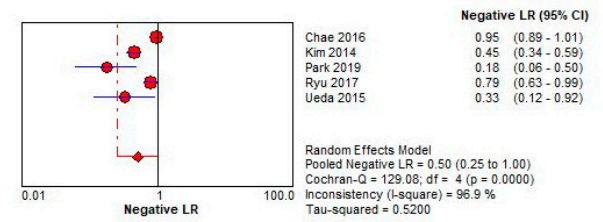

D

**Figure S2.** Pooled prognostic accuracy of the optic nerve sheath diameter for poor neurological outcome. **A:** Pooled sensitivity, **B:** pooled specificity, **C:** pooled positive likelihood ratio, **D:** pooled negative likelihood ratio. Abbreviations: CI = confidence interval; LR = likelihood.
